# Supplementary material for: A Diketopiperazine, Cyclo-(L-Pro-L-Ile), Derived From Bacillus thuringiensis JCK-1233 Controls Pine Wilt Disease by Elicitation of Moderate Hypersensitive Reaction
Source: Front Plant Sci. 2020 Jul 8;11:1023. doi: 10.3389/fpls.2020.01023 (PMC7396504; doi:10.3389/fpls.2020.01023)
Supplement: Supplementary file 1 [file DataSheet_1.docx]

**Supplementary Data S1**

**A Diketopiperazine, *Cyclo*-(L-Pro-L-Ile), Derived from *Bacillus thuringiensis* JCK-1233 Controls Pine Wilt Disease by Elicitation of Moderate Hypersensitive Reaction**

**Ae Ran Park1†, Se-In Jeong1†, Hee Won Jeon1, Jueun Kim 2, Namgyu Kim3, Manh Tuan Ha4, Mohamed Mannaa3, Junheon Kim5, Chul Won Lee 2, Byung Sun Min4, Young-Su Seo3*, and Jin-Cheol Kim1***

1Department of Agricultural Chemistry, Institute of Environmentally Friendly Agriculture, College of Agriculture and Life Sciences, Chonnam National University, Gwangju, South Korea

2Department of Chemistry, Chonnam National University, Gwangju, South Korea

3Department of Integrated Biological Science, College of Natural Science, Pusan National University, Busan, South Korea

4College of Pharmacy, Drug Research and Development Center, Daegu Catholic University, Gyeongbuk, South Korea.

5Forest Insect Pests and Diseases Division, National Institute of Forest Science, Seoul, South Korea

*****Correspondence:

Jin-Cheol Kim, [kjinc@jnu.ac.kr](mailto:kjinc@jnu.ac.kr); Young-Su Seo, yseo2011@pusan.ac.kr

**†**These authors have contributed equally to this work.

Running title: Diketopiperazine-induced resistance in pine

**Supplementary Data S1.** Effects of endophytic bacterial strains on GUS expression induced by explanting in leaf tissue of AtPR1-GUS *Arabidopsis* plant seedlings

| Strain | GUS activity | Strain | GUS activity | Strain | GUS activity |
| --- | --- | --- | --- | --- | --- |
| JCK-726 | - | JCK-1062 | - | JCK-1230 | - |
| JCK-727 | - | JCK-1063 | - | JCK-1231 | - |
| JCK-736 | - | JCK-1064 | - | JCK-1232 | - |
| JCK-737 | - | JCK-1065 | - | JCK-1233 | * |
| JCK-738 | - | JCK-1066 | - | JCK-1234 | - |
| JCK-742 | - | JCK-1067 | - | JCK-1235 | - |
| JCK-743 | - | JCK-1068 | - | JCK-1236 | - |
| JCK-744 | - | JCK-1069 | - | JCK-1237 | - |
| JCK-745 | - | JCK-1070 | - | JCK-1238 | - |
| JCK-748 | - | JCK-1071 | - | JCK-1239 | - |
| JCK-749 | - | JCK-1072 | - | JCK-1240 | - |
| JCK-750 | - | JCK-1073 | - | JCK-1241 | - |
| JCK-751 | - | JCK-1074 | - | JCK-1242 | - |
| JCK-752 | - | JCK-1075 | - | JCK-1243 | - |
| JCK-753 | * | JCK-1076 | - | JCK-1244 | - |
| JCK-754 | - | JCK-1077 | - | JCK-1245 | - |
| JCK-755 | - | JCK-1078 | - | JCK-1246 | - |
| JCK-756 | - | JCK-1079 | - | JCK-1247 | - |
| JCK-757 | - | JCK-1080 | - | JCK-1248 | - |
| JCK-758-1 | * | JCK-1081 | - | JCK-1249 | - |
| JCK-758-2 | * | JCK-1082 | - | JCK-1250 | - |
| JCK-759 | - | JCK-1083 | - | JCK-1251 | - |
| JCK-761 | * | JCK-1084 | - | JCK-1252 | - |
| JCK-762 | - | JCK-1085 | - | JCK-1253 | - |
| JCK-763 | - | JCK-1086 | - | JCK-1254 | - |
| JCK-764 | - | JCK-1087 | - | JCK-1255 | - |
| JCK-765 | - | JCK-1088 | - | JCK-1256 | - |
| JCK-766 | - | JCK-1089 | - | JCK-1257 | - |
| JCK-767 | * | JCK-1090 | - | JCK-1258 | - |
| JCK-768 | - | JCK-1091 | - | JCK-1259 | - |
| JCK-769 | - | JCK-1092 | - | JCK-1260 | - |
| JCK-770 | - | JCK-1093 | - | JCK-1261 | - |
| JCK-771 | - | JCK-1094 | - | JCK-1262 | - |
| JCK-772 | - | JCK-1095 | - | JCK-1263 | - |
| JCK-773 | - | JCK-1096 | - | JCK-1264 | - |
| JCK-774 | - | JCK-1097 | - | JCK-1265 | - |
| JCK-775 | - | JCK-1098 | - | JCK-1266 | * |
| JCK-776 | - | JCK-1099 | - | JCK-1267 | - |
| JCK-777 | - | JCK-1100 | - | JCK-1268 | - |
| JCK-778 | - | JCK-1101 | - | JCK-1269 | - |
| JCK-779 | - | JCK-1102 | - | JCK-1270 | - |
| JCK-780 | - | JCK-1103 | - | JCK-1271 | - |
| JCK-781 | - | JCK-1104 | - | JCK-1272 | - |
| JCK-782 | - | JCK-1105 | - | JCK-1273 | - |
| JCK-783 | - | JCK-1106 | - | JCK-1274 | - |
| JCK-925 | - | JCK-1107 | - | JCK-1275 | - |
| JCK-926 | - | JCK-1108 | - | JCK-1276 | - |
| JCK-927 | - | JCK-1109 | - | JCK-1277 | - |
| JCK-928 | - | JCK-1110 | - | JCK-1278 | - |
| JCK-929 | - | JCK-1111 | - | JCK-1279 | - |
| JCK-930 | - | JCK-1112 | - | JCK-1280 | - |
| JCK-931 | - | JCK-1113 | - | JCK-1281 | - |
| JCK-932 | - | JCK-1114 | - | JCK-1282 | - |
| JCK-933 | - | JCK-1115 | - | JCK-1283 | - |
| JCK-934 | - | JCK-1116 | - | JCK-1284 | - |
| JCK-935 | - | JCK-1117 | - | JCK-1285 | - |
| JCK-936 | - | JCK-1118 | - | JCK-1286 | - |
| JCK-937 | - | JCK-1119 | - | JCK-1287 | * |
| JCK-938 | - | JCK-1120 | - | JCK-1288 | * |
| JCK-939 | - | JCK-1121 | - | JCK-1289 | - |
| JCK-940 | - | JCK-1122 | - | JCK-1290 | - |
| JCK-941 | - | JCK-1123 | - | JCK-1291 | - |
| JCK-942 | - | JCK-1124 | - | JCK-1292 | - |
| JCK-943 | - | JCK-1125 | - | JCK-1293 | - |
| JCK-944 | - | JCK-1126 | - | JCK-1294 | - |
| JCK-945 | - | JCK-1127 | - | JCK-1295 | - |
| JCK-946 | - | JCK-1128 | - | JCK-1296 | - |
| JCK-947 | * | JCK-1129 | - | JCK-1297 | - |
| JCK-949 | - | JCK-1130 | - | JCK-1298 | - |
| JCK-950 | - | JCK-1131 | - | JCK-1299 | - |
| JCK-951 | - | JCK-1132 | - | JCK-1300 | - |
| JCK-952 | - | JCK-1133 | - | JCK-1301 | - |
| JCK-953 | - | JCK-1134 | - | JCK-1302 | - |
| JCK-954 | - | JCK-1135 | - | JCK-1303 | - |
| JCK-955 | - | JCK-1136 | - | JCK-1304 | - |
| JCK-956 | - | JCK-1137 | - | JCK-1305 | - |
| JCK-957 | - | JCK-1138 | - | JCK-1306 | - |
| JCK-958 | - | JCK-1139 | - | JCK-1307 | * |
| JCK-959 | - | JCK-1140 | - | JCK-1308 | * |
| JCK-960 | - | JCK-1141 | - | JCK-1309 | * |
| JCK-961 | - | JCK-1142 | - | JCK-1310 | - |
| JCK-962 | - | JCK-1143 | - | JCK-1311 | - |
| JCK-963 | - | JCK-1144 | - | JCK-1312 | - |
| JCK-964 | - | JCK-1145 | - | JCK-1313 | - |
| JCK-965 | - | JCK-1146 | - | JCK-1314 | - |
| JCK-966 | - | JCK-1147 | - | JCK-1315 | - |
| JCK-967 | - | JCK-1148 | - | JCK-1316 | - |
| JCK-968 | - | JCK-1149 | - | JCK-1317 | - |
| JCK-969 | - | JCK-1150 | - | JCK-1318 | * |
| JCK-970 | - | JCK-1151 | - | JCK-1319 | - |
| JCK-971 | - | JCK-1152 | - | JCK-1320 | * |
| JCK-972 | - | JCK-1153 | - | JCK-1321 | - |
| JCK-973 | - | JCK-1154 | - | JCK-1322 | - |
| JCK-974 | - | JCK-1155 | - | JCK-1323 | - |
| JCK-975 | - | JCK-1156 | - | JCK-1324 | - |
| JCK-976 | - | JCK-1157 | - | JCK-1325 | - |
| JCK-977 | - | JCK-1158 | - | JCK-1326 | - |
| JCK-978 | - | JCK-1159 | - | JCK-1327 | - |
| JCK-979 | - | JCK-1160 | - | JCK-1328 | * |
| JCK-980 | - | JCK-1161 | - | JCK-1329 | - |
| JCK-981 | - | JCK-1162 | - | JCK-1330 | - |
| JCK-982 | - | JCK-1163 | - | JCK-1331 | - |
| JCK-983 | - | JCK-1164 | - | JCK-1332 | - |
| JCK-984 | - | JCK-1165 | - | JCK-1333 | * |
| JCK-985 | - | JCK-1166 | - | JCK-1334 | - |
| JCK-986 | - | JCK-1167 | - | JCK-1335 | - |
| JCK-987 | - | JCK-1168 | - | JCK-1336 | - |
| JCK-988 | - | JCK-1169 | - | JCK-1337 | - |
| JCK-1000 | - | JCK-1170 | - | JCK-1338 | - |
| JCK-1001 | - | JCK-1171 | - | JCK-1339 | - |
| JCK-1002 | - | JCK-1172 | - | JCK-1340 | - |
| JCK-1003 | - | JCK-1173 | - | JCK-1341 | - |
| JCK-1004 | - | JCK-1174 | - | JCK-1342 | - |
| JCK-1005 | * | JCK-1175 | - | JCK-1343 | - |
| JCK-1006 | - | JCK-1176 | - | JCK-1344 | - |
| JCK-1007 | - | JCK-1177 | - | JCK-1345 | - |
| JCK-1008 | - | JCK-1178 | - | JCK-1346 | - |
| JCK-1009 | - | JCK-1179 | - | JCK-1347 | - |
| JCK-1010 | - | JCK-1180 | * | JCK-1348 | - |
| JCK-1011 | - | JCK-1181 | - | JCK-1349 | - |
| JCK-1012 | - | JCK-1182 | * | JCK-1350 | - |
| JCK-1013 | - | JCK-1183 | - | JCK-1351 | - |
| JCK-1014 | - | JCK-1184 | - | JCK-1352 | - |
| JCK-1015 | - | JCK-1185 | - | JCK-1353 | - |
| JCK-1016 | - | JCK-1186 | - | JCK-1354 | - |
| JCK-1017 | - | JCK-1187 | * | JCK-1355 | - |
| JCK-1018 | - | JCK-1188 | - | JCK-1356 | - |
| JCK-1019 | - | JCK-1189 | - | JCK-1357 | - |
| JCK-1020 | - | JCK-1190 | - | JCK-1358 | - |
| JCK-1021 | - | JCK-1191 | - | JCK-1359 | - |
| JCK-1022 | - | JCK-1192 | - | JCK-1360 | - |
| JCK-1023 | - | JCK-1193 | - | JCK-1361 | - |
| JCK-1024 | - | JCK-1194 | - | JCK-1362 | - |
| JCK-1025 | - | JCK-1195 | - | JCK-1363 | - |
| JCK-1026 | - | JCK-1196 | - | JCK-1364 | - |
| JCK-1027 | - | JCK-1197 | - | JCK-1365 | - |
| JCK-1028 | - | JCK-1198 | - | JCK-1366 | - |
| JCK-1029 | - | JCK-1199 | - | JCK-1367 | - |
| JCK-1032 | - | JCK-1200 | - | JCK-1368 | - |
| JCK-1033 | - | JCK-1201 | - | JCK-1369 | - |
| JCK-1034 | - | JCK-1202 | - | JCK-1370 | - |
| JCK-1035 | - | JCK-1203 | - | JCK-1371 | - |
| JCK-1036 | - | JCK-1204 | - | JCK-1372 | - |
| JCK-1037 | - | JCK-1205 | - | JCK-1373 | - |
| JCK-1038 | - | JCK-1206 | - | JCK-1374 | - |
| JCK-1039 | - | JCK-1207 | - | JCK-1375 | - |
| JCK-1040 | - | JCK-1208 | - | JCK-1376 | - |
| JCK-1041 | - | JCK-1209 | - | JCK-1377 | - |
| JCK-1042 | - | JCK-1210 | - | JCK-1378 | - |
| JCK-1043 | - | JCK-1211 | - | JCK-1379 | - |
| JCK-1044 | - | JCK-1212 | - | JCK-1380 | - |
| JCK-1045 | - | JCK-1213 | - | JCK-1381 | - |
| JCK-1046 | - | JCK-1214 | - | JCK-1382 | - |
| JCK-1047 | - | JCK-1215 | - | JCK-1383 | - |
| JCK-1048 | - | JCK-1216 | - | JCK-1384 | - |
| JCK-1049 | - | JCK-1217 | * | JCK-1385 | - |
| JCK-1050 | - | JCK-1218 | - | JCK-1386 | - |
| JCK-1051 | - | JCK-1219 | - | JCK-1387 | - |
| JCK-1052 | - | JCK-1220 | - | JCK-1388 | - |
| JCK-1053 | - | JCK-1221 | - | JCK-1389 | - |
| JCK-1056 | - | JCK-1222 | * | JCK-1390 | - |
| JCK-1055 | - | JCK-1223 | - | JCK-1391 | - |
| JCK-1056 | - | JCK-1224 | - | JCK-1392 | - |
| JCK-1057 | - | JCK-1225 | - | JCK-1393 | - |
| JCK-1058 | - | JCK-1226 | - | JCK-1394 | - |
| JCK-1059 | - | JCK-1227 | - | JCK-1395 | - |
| JCK-1060  JCK-1061 | -  - | JCK-1228  JCK-1229 | -  * | JCK-1396  JCK-1397 | -  - |

-, no visible GUS expression; *, induced GUS expression, All data were obtained from three replicates.
