# Supplementary material for: A Diketopiperazine, Cyclo-(L-Pro-L-Ile), Derived From Bacillus thuringiensis JCK-1233 Controls Pine Wilt Disease by Elicitation of Moderate Hypersensitive Reaction
Source: Front Plant Sci. 2020 Jul 8;11:1023. doi: 10.3389/fpls.2020.01023 (PMC7396504; doi:10.3389/fpls.2020.01023)
Supplement: Supplementary file 2 [file DataSheet_2.docx]

**Supplementary Data S2**

**A Diketopiperazine, *Cyclo*-(L-Pro-L-Ile), Derived from *Bacillus thuringiensis* JCK-1233 Controls Pine Wilt Disease by Elicitation of Moderate Hypersensitive Reaction**

**Ae Ran Park1†, Se-In Jeong1†, Hee Won Jeon1, Jueun Kim 2, Namgyu Kim3, Manh Tuan Ha4, Mohamed Mannaa3, Junheon Kim5, Chul Won Lee 2, Byung Sun Min4, Young-Su Seo3*, and Jin-Cheol Kim1***

1Department of Agricultural Chemistry, Institute of Environmentally Friendly Agriculture, College of Agriculture and Life Sciences, Chonnam National University, Gwangju, South Korea

2Department of Chemistry, Chonnam National University, Gwangju, South Korea

3Department of Integrated Biological Science, College of Natural Science, Pusan National University, Busan, South Korea

4College of Pharmacy, Drug Research and Development Center, Daegu Catholic University, Gyeongbuk, South Korea.

5Forest Insect Pests and Diseases Division, National Institute of Forest Science, Seoul, South Korea

*****Correspondence:

Jin-Cheol Kim, [kjinc@jnu.ac.kr](mailto:kjinc@jnu.ac.kr); Young-Su Seo, yseo2011@pusan.ac.kr

**†**These authors have contributed equally to this work.

Running title: Diketopiperazine-induced resistance in pine

Figure S1.1. 1H NMR spectrum (500 MHz, CD3OD) of compound 1 (*cyclo*-(D-Pro-L-Val))

Figure S1.2. 13C NMR spectrum (125 MHz, CD3OD) of compound 1 (*cyclo*-(D-Pro-L-Val))

Figure S1.3. DEPT spectrum (125 MHz, CD3OD) of compound 1 (*cyclo*-(D-Pro-L-Val))

Figure S1.4. HMQC spectrum of compound 1 (*cyclo*-(D-Pro-L-Val))

Figure S1.5. 1H-1H COSY spectrum of compound 1 (*cyclo*-(D-Pro-L-Val))

Figure S1.6. HMBC spectrum of compound 1 (*cyclo*-(D-Pro-L-Val))

Figure S1.7. 1H-1H NOESY spectrum of compound 1 (*cyclo*-(D-Pro-L-Val))

Figure S1.8. HRESIMS spectrum of compound 1 (*cyclo*-(D-Pro-L-Val))

Figure S2.1. 1H NMR spectrum (500 MHz, CD3OD) of compound 2 (*cyclo*-(L-Pro-L-Ile))

Figure S2.2. 13C NMR spectrum (125 MHz, CD3OD) of compound 2 (*cyclo*-(L-Pro-L-Ile))

Figure S2.3. DEPT spectrum (125 MHz, CD3OD) of compound 2 (*cyclo*-(L-Pro-L-Ile))

Figure S2.4. HMQC spectrum of compound 2 (*cyclo*-(L-Pro-L-Ile))

Figure S2.5. 1H-1H COSY spectrum of compound 2 (*cyclo*-(L-Pro-L-Ile))

Figure S2.6. HMBC spectrum of compound 2 (*cyclo*-(L-Pro-L-Ile))

Figure S2.7. 1H-1H NOESY spectrum of compound 2 (*cyclo*-(L-Pro-L-Ile))

Figure S2.8. HRESIMS spectrum of compound 2 (*cyclo*-(L-Pro-L-Ile))

Figure S3.1. 1H NMR spectrum (500 MHz, CD3OD) of compound 3 (*cyclo*-(L-Pro-L-Phe))

Figure S3.2. 13C NMR spectrum (125 MHz, CD3OD) of compound 3 (*cyclo*-(L-Pro-L-Phe))

Figure S3.3. DEPT spectrum (125 MHz, CD3OD) of compound 3 (*cyclo*-(L-Pro-L-Phe))

Figure S3.4. HMQC spectrum of compound 3 (*cyclo*-(L-Pro-L-Phe))

Figure S3.5. 1H-1H COSY spectrum of compound 3 (*cyclo*-(L-Pro-L-Phe))

Figure S3.6. HMBC spectrum of compound 3 (*cyclo*-(L-Pro-L-Phe))

Figure S3.7. 1H-1H NOESY spectrum of compound 3 (*cyclo*-(L-Pro-L-Phe))

Figure S3.8. HRESIMS spectrum of compound 3 (*cyclo*-(L-Pro-L-Phe))

Figure S4.1. 1H NMR spectrum (500 MHz, CD3OD) of compound 4 (*cyclo*-(L-Leu-L-Val))

Figure S4.2. 13C NMR spectrum (125 MHz, CD3OD) of compound 4 (*cyclo*-( L-Leu-L-Val))

Figure S4.3. DEPT spectrum (125 MHz, CD3OD) of compound 4 (*cyclo*-(L-Leu-L-Val))

Figure S4.4. HMQC spectrum of compound 4 (*cyclo*-(L-Leu-L-Val))

Figure S4.5. 1H-1H COSY spectrum of compound 4 (*cyclo*-(L-Leu-L-Val))

Figure S4.6. HMBC spectrum of compound 4 (*cyclo*-(L-Leu-L-Val))

Figure S4.7. 1H-1H NOESY spectrum of compound 4 (*cyclo*-(L-Leu-L-Val))

Figure S4.8. HRESIMS spectrum of compound 4 (*cyclo*-(L-Leu-L-Val))
